# Supplementary material for: The impact of artificial intelligence on the reading times of radiologists for chest radiographs
Source: PubMed Central journal article supplement (PMC10148851; doi:10.1038/s41746-023-00829-4), 2023-04-29
Supplement: 41746_2023_829_MOESM1_ESM.pdf [file 41746_2023_829_MOESM1_ESM.pdf]

## Supplementary Information

| no | seconds | age ran | in or ou | atelecta | cardion | consolid | fibrosis | nodule | pleural | pneum | pneum | abnorm | AI | location |
|----|---------|---------|----------|----------|---------|----------|----------|--------|---------|-------|-------|--------|----|----------|
| 1  | 18      | 60-69   | I        | 1.04     | 0.96    | 20.49    | 37.96    | 4.45   | 0.45    | 0.33  | 0.59  | 37.96  | 0  | general  |
| 2  | 18      | 70-     | I        | 10.2     | 6.93    | 97.51    | 31.09    | 38.36  | 4.01    | 0.49  | 3.42  | 97.51  | 0  | general  |
| 3  | 6       | 70-     | I        | 31.28    | 13.92   | 94.76    | 28.93    | 16.06  | 90.29   | 0.46  | 1.31  | 94.76  | 0  | general  |
| 4  | 9       | 30-39   | I        | 2.07     | 6.19    | 97.44    | 33.35    | 11.75  | 18.42   | 1.05  | 86.93 | 97.44  | 0  | general  |
| 5  | 6       | 70-     | I        | 2.94     | 44.41   | 8.8      | 13.39    | 7.13   | 1.49    | 0.4   | 0.31  | 44.41  | 0  | general  |
| 6  | 6       | 70-     | I        | 6.04     | 88.11   | 82.12    | 5.14     | 18.85  | 10.59   | 0.71  | 1.15  | 88.11  | 0  | general  |
| 7  | 24      | 70-     | I        | 27.27    | 28.35   | 96.29    | 28.27    | 10.39  | 95.51   | 0.5   | 1.8   | 96.29  | 0  | general  |
| 8  | 13      | 60-69   | I        | 1.32     | 0.24    | 2.19     | 2.58     | 1.71   | 44.8    | 0.43  | 0.47  | 44.8   | 0  | general  |
| 9  | 8       | 60-69   | I        | 0.71     | 0.65    | 2.08     | 0.7      | 1.81   | 0.21    | 0.48  | 0.35  | 2.08   | 0  | ER       |
| 10 | 17      | 40-49   | O        | 0.14     | 0.1     | 0.19     | 0.2      | 0.39   | 0.21    | 0.17  | 0.12  | 0.39   | 0  | out      |
| 11 | 16      | 40-49   | I        | 4.9      | 0.79    | 49.82    | 88.02    | 11.24  | 78.01   | 2.14  | 92.85 | 92.85  | 0  | general  |
| 12 | 4       | 50-59   | I        | 41.79    | 0.36    | 7.95     | 3.25     | 10.93  | 0.54    | 0.61  | 0.44  | 41.79  | 0  | general  |
| 13 | 8       | 70-     | I        | 2.39     | 0.86    | 12.79    | 5.64     | 4.54   | 1.5     | 1.29  | 2.14  | 12.79  | 0  | general  |
| 14 | 19      | 70-     | I        | 16.91    | 56.32   | 76.26    | 48.83    | 13.55  | 96.21   | 0.76  | 1.28  | 96.21  | 0  | general  |
| 15 | 9       | 70-     | I        | 7.22     | 73.17   | 8.56     | 4.43     | 6.9    | 7.76    | 0.45  | 1.61  | 73.17  | 0  | general  |
| 16 | 40      | 50-59   | I        | 75       | 35.19   | 21.87    | 4.23     | 4.18   | 4.3     | 69.08 | 1.51  | 75     | 0  | general  |
| 17 | 5       | 70-     | I        | 52.65    | 48.28   | 75.13    | 39.24    | 28.04  | 37.09   | 0.76  | 2.04  | 75.13  | 0  | general  |
| 18 | 22      | 60-69   | I        | 2.71     | 45.41   | 98.25    | 2.93     | 24.13  | 78.54   | 0.44  | 3.15  | 98.25  | 0  | general  |
| 19 | 10      | 70-     | I        | 18       | 13.69   | 43.03    | 4.87     | 14.76  | 3.35    | 0.4   | 0.7   | 43.03  | 0  | ICU      |
| 20 | 5       | 50-59   | I        | 1.77     | 13.36   | 98.51    | 14.24    | 17     | 9.46    | 0.49  | 0.57  | 98.51  | 0  | general  |
| 21 | 4       | 70-     | I        | 5.54     | 77.73   | 64.66    | 6.93     | 10.32  | 3.48    | 0.44  | 0.52  | 77.73  | 0  | general  |
| 22 | 5       | 70-     | I        | 6.94     | 11.66   | 74.5     | 8.5      | 16.73  | 93.09   | 2.35  | 6.49  | 93.09  | 0  | general  |
| 23 | 7       | 70-     | I        | 0.26     | 0.27    | 0.43     | 0.76     | 0.84   | 0.87    | 0.26  | 0.19  | 0.87   | 0  | ER       |
| 24 | 16      | 70-     | I        | 94.91    | 7.47    | 5.73     | 5.4      | 3.25   | 2.8     | 0.52  | 0.32  | 94.91  | 0  | ER       |
| 25 | 30      | 70-     | I        | 0.66     | 0.64    | 3.57     | 2.08     | 2.37   | 0.55    | 0.9   | 25.1  | 25.1   | 0  | ER       |
| 26 | 18      | 70-     | I        | 2.98     | 0.24    | 0.77     | 2.13     | 3.97   | 0.23    | 0.34  | 0.19  | 3.97   | 0  | general  |
| 27 | 10      | 70-     | I        | 2.22     | 0.33    | 3.67     | 20.56    | 1.94   | 4.82    | 0.49  | 0.37  | 20.56  | 0  | general  |
| 28 | 13      | 50-59   | I        | 0.57     | 0.21    | 1.03     | 1.6      | 40.07  | 0.39    | 0.52  | 0.28  | 40.07  | 0  | general  |
| 29 | 49      | 50-59   | I        | 1.11     | 0.32    | 2.47     | 4.98     | 39.03  | 0.36    | 0.48  | 0.32  | 39.03  | 0  | general  |
| 30 | 4       | 40-49   | I        | 1.32     | 0.7     | 49.45    | 70.8     | 47.55  | 1.37    | 0.62  | 0.63  | 70.8   | 0  | general  |
| 31 | 25      | 70-     | I        | 6.23     | 0.85    | 70.62    | 55.98    | 15.93  | 80.14   | 0.85  | 4.64  | 80.14  | 0  | general  |
| 32 | 17      | 60-69   | I        | 29.05    | 73.31   | 78.67    | 2.49     | 19.4   | 97.89   | 0.43  | 0.53  | 97.89  | 0  | general  |
| 33 | 22      | 50-59   | I        | 80.79    | 5.62    | 97.21    | 47.75    | 17.42  | 97.15   | 1.09  | 1.17  | 97.21  | 0  | general  |
| 34 | 15      | 70-     | I        | 3.09     | 96.71   | 84.45    | 5.25     | 6.89   | 72.32   | 0.55  | 0.55  | 96.71  | 0  | general  |
| 35 | 6       | 70-     | I        | 4.71     | 9.73    | 97.97    | 7.69     | 17.22  | 89.5    | 0.79  | 2.01  | 97.97  | 0  | ICU      |
| 36 | 16      | 70-     | I        | 68.96    | 9.34    | 83.93    | 8.91     | 10.09  | 22.16   | 0.8   | 0.66  | 83.93  | 0  | ER       |
| 37 | 5       | 70-     | I        | 11.62    | 37.96   | 66.8     | 4.81     | 6.24   | 25.79   | 0.49  | 1     | 66.8   | 0  | ICU      |
| 38 | 7       | 70-     | I        | 1.66     | 5.98    | 0.83     | 1.21     | 3.03   | 0.41    | 2.35  | 0.72  | 5.98   | 0  | ER       |

|    |    |       |   |       |       |       |       |       |       |       |       |       |           |
|----|----|-------|---|-------|-------|-------|-------|-------|-------|-------|-------|-------|-----------|
| 39 | 9  | 19-29 | I | 0.1   | 0.09  | 0.42  | 0.18  | 0.33  | 0.13  | 0.13  | 0.13  | 0.42  | 0 ER      |
| 40 | 7  | 70-   | I | 25.49 | 12.78 | 85.23 | 7.59  | 56.43 | 6.12  | 0.68  | 4.03  | 85.23 | 0 general |
| 41 | 5  | 60-69 | O | 0.21  | 1.01  | 0.35  | 7.42  | 0.99  | 0.22  | 0.2   | 0.17  | 7.42  | 0 out     |
| 42 | 4  | 50-59 | O | 0.23  | 0.14  | 2.66  | 0.53  | 0.87  | 0.33  | 0.27  | 0.23  | 2.66  | 0 out     |
| 43 | 6  | 60-69 | O | 0.84  | 0.2   | 1.34  | 1.46  | 1.53  | 7.27  | 0.45  | 0.28  | 7.27  | 0 out     |
| 44 | 5  | 60-69 | O | 0.21  | 0.28  | 0.74  | 0.8   | 0.88  | 0.77  | 0.24  | 0.19  | 0.88  | 0 out     |
| 45 | 6  | 60-69 | I | 40.67 | 1.25  | 76.21 | 16.97 | 9.63  | 5.34  | 5.75  | 9.49  | 76.21 | 0 general |
| 46 | 5  | 60-69 | O | 4.04  | 2.66  | 0.42  | 0.31  | 0.7   | 0.25  | 0.25  | 0.1   | 4.04  | 0 out     |
| 47 | 5  | 50-59 | I | 1.63  | 3.09  | 98.63 | 3.28  | 58.39 | 4.04  | 0.4   | 0.53  | 98.63 | 0 general |
| 48 | 4  | 60-69 | O | 0.27  | 0.2   | 0.29  | 1.41  | 0.78  | 0.25  | 0.21  | 0.15  | 1.41  | 0 out     |
| 49 | 4  | 50-59 | O | 0.15  | 0.14  | 0.24  | 1.84  | 0.74  | 0.21  | 0.22  | 0.19  | 1.84  | 0 out     |
| 50 | 45 | 70-   | I | 52.38 | 0.78  | 31.53 | 41.42 | 7.09  | 8.67  | 2.56  | 1.31  | 52.38 | 0 general |
| 51 | 13 | 50-59 | I | 0.19  | 0.13  | 0.16  | 0.7   | 0.87  | 0.34  | 0.29  | 0.18  | 0.87  | 0 general |
| 52 | 7  | 70-   | O | 0.36  | 1.58  | 0.85  | 0.52  | 1.02  | 0.31  | 0.23  | 0.14  | 1.58  | 0 out     |
| 53 | 7  | 70-   | O | 1.53  | 0.61  | 1.13  | 0.93  | 0.99  | 0.44  | 0.3   | 0.79  | 1.53  | 0 out     |
| 54 | 5  | 70-   | O | 0.92  | 0.22  | 1.07  | 2.51  | 3.35  | 1.38  | 0.41  | 0.22  | 3.35  | 0 out     |
| 55 | 20 | 50-59 | I | 0.22  | 0.13  | 0.21  | 1.59  | 0.61  | 0.21  | 0.19  | 0.15  | 1.59  | 0 general |
| 56 | 16 | 70-   | I | 5.4   | 14.03 | 66.13 | 8.18  | 30.22 | 80.08 | 3.4   | 21.71 | 80.08 | 0 general |
| 57 | 16 | 70-   | O | 64.8  | 0.55  | 46.99 | 36.92 | 37.17 | 2     | 0.48  | 0.57  | 64.8  | 0 out     |
| 58 | 23 | 70-   | I | 9.02  | 1.18  | 73.06 | 49.54 | 9.34  | 79.7  | 0.85  | 4.76  | 79.7  | 0 general |
| 59 | 10 | 50-59 | O | 13.43 | 1.64  | 8.52  | 2.51  | 4.66  | 95.87 | 2.53  | 1.54  | 95.87 | 0 out     |
| 60 | 7  | 50-59 | O | 1.27  | 64.8  | 3.01  | 0.95  | 3.05  | 1.74  | 0.35  | 0.39  | 64.8  | 0 out     |
| 61 | 25 | 60-69 | O | 3.88  | 1.33  | 81.84 | 66.13 | 5.2   | 1.46  | 0.49  | 0.4   | 81.84 | 0 out     |
| 62 | 6  | 60-69 | I | 7.73  | 69.89 | 86.59 | 26.74 | 15.89 | 1.3   | 1.55  | 0.63  | 86.59 | 0 general |
| 63 | 5  | 60-69 | O | 8.43  | 9.63  | 78.8  | 89.22 | 15.45 | 1.77  | 0.62  | 0.99  | 89.22 | 0 out     |
| 64 | 5  | 70-   | I | 13.38 | 59.97 | 94.12 | 4.2   | 15.55 | 89.35 | 0.58  | 1.95  | 94.12 | 0 ICU     |
| 65 | 19 | 40-49 | I | 14.99 | 1.03  | 23.59 | 90.37 | 8.31  | 59.88 | 1.85  | 54.44 | 90.37 | 0 general |
| 66 | 5  | 70-   | I | 12.63 | 54.82 | 34.25 | 11.25 | 43.82 | 4.68  | 3.73  | 0.62  | 54.82 | 0 ICU     |
| 67 | 4  | 70-   | O | 1.72  | 22.16 | 5.17  | 2.06  | 3.26  | 0.39  | 0.24  | 0.22  | 22.16 | 0 out     |
| 68 | 6  | 50-59 | O | 0.39  | 0.44  | 0.56  | 0.62  | 1.42  | 0.38  | 0.24  | 0.22  | 1.42  | 0 out     |
| 69 | 19 | 60-69 | O | 93.17 | 0.3   | 9.54  | 23.04 | 3.47  | 2.36  | 1.46  | 0.66  | 93.17 | 0 out     |
| 70 | 6  | 70-   | I | 2.19  | 7.44  | 98.8  | 10.49 | 17.52 | 89.23 | 0.93  | 1.52  | 98.8  | 0 ICU     |
| 71 | 7  | 70-   | O | 1.88  | 3.09  | 97.38 | 60.89 | 10.3  | 38.27 | 0.53  | 6.88  | 97.38 | 0 out     |
| 72 | 6  | 70-   | O | 0.38  | 0.22  | 0.7   | 13.5  | 1.45  | 0.33  | 0.34  | 0.57  | 13.5  | 0 out     |
| 73 | 16 | 70-   | I | 2.1   | 0.57  | 4.31  | 3.06  | 2.76  | 0.75  | 1.81  | 0.47  | 4.31  | 0 ER      |
| 74 | 3  | 60-69 | I | 2.12  | 0.4   | 2.43  | 1.18  | 3.02  | 0.62  | 2.8   | 0.43  | 3.02  | 0 general |
| 75 | 5  | 30-39 | I | 0.55  | 0.19  | 0.91  | 0.41  | 0.55  | 0.96  | 0.68  | 0.22  | 0.96  | 0 general |
| 76 | 28 | 60-69 | I | 1.8   | 0.39  | 31.22 | 33.33 | 20.06 | 0.71  | 1.28  | 0.57  | 33.33 | 0 general |
| 77 | 31 | 60-69 | I | 3.22  | 12.58 | 13.61 | 62.74 | 8.12  | 1.36  | 34.72 | 1.06  | 62.74 | 0 general |

|     |    |       |   |       |       |       |       |       |       |      |       |       |   |         |
|-----|----|-------|---|-------|-------|-------|-------|-------|-------|------|-------|-------|---|---------|
| 78  | 4  | 70-   | I | 0.83  | 28.16 | 3.42  | 1.26  | 6.09  | 0.88  | 0.24 | 0.2   | 28.16 | 0 | general |
| 79  | 7  | 50-59 | I | 0.27  | 0.14  | 0.33  | 0.45  | 0.55  | 4.65  | 0.27 | 0.18  | 4.65  | 0 | general |
| 80  | 6  | 50-59 | I | 0.35  | 0.14  | 0.37  | 3.38  | 0.76  | 0.29  | 0.2  | 0.21  | 3.38  | 0 | general |
| 81  | 44 | 30-39 | I | 3.59  | 29.98 | 97.02 | 34.74 | 18.31 | 34.22 | 1.25 | 95.1  | 97.02 | 0 | general |
| 82  | 9  | 70-   | O | 0.47  | 0.13  | 0.43  | 0.6   | 0.79  | 0.22  | 0.33 | 0.18  | 0.79  | 0 | out     |
| 83  | 43 | 70-   | I | 12.44 | 7.03  | 79.01 | 20.35 | 15.87 | 72.09 | 1.19 | 1.04  | 79.01 | 0 | general |
| 84  | 5  | 70-   | O | 0.89  | 25.28 | 2.09  | 1.21  | 1.28  | 0.36  | 0.2  | 0.16  | 25.28 | 0 | out     |
| 85  | 16 | 70-   | I | 11.96 | 6.34  | 35.05 | 15.6  | 11.69 | 0.84  | 1.77 | 0.59  | 35.05 | 0 | general |
| 86  | 51 | 50-59 | O | 50.19 | 0.65  | 16.24 | 13    | 46.19 | 7.66  | 0.46 | 0.35  | 50.19 | 0 | out     |
| 87  | 5  | 40-49 | O | 60.57 | 0.75  | 31.28 | 18.19 | 4.01  | 3.11  | 1.46 | 0.31  | 60.57 | 0 | out     |
| 88  | 9  | 60-69 | I | 0.43  | 12.4  | 0.85  | 0.38  | 0.56  | 0.3   | 0.27 | 0.15  | 12.4  | 0 | general |
| 89  | 5  | 70-   | O | 1.21  | 12.7  | 1.56  | 1.03  | 1.4   | 0.45  | 1.14 | 0.18  | 12.7  | 0 | out     |
| 90  | 27 | 70-   | I | 2.49  | 8.94  | 89.24 | 4.54  | 17.79 | 1.81  | 0.63 | 0.44  | 89.24 | 0 | general |
| 91  | 14 | 70-   | O | 0.7   | 0.83  | 1.64  | 0.82  | 1.17  | 13.29 | 0.4  | 0.28  | 13.29 | 0 | out     |
| 92  | 38 | 70-   | O | 5.86  | 93.72 | 12.01 | 5.48  | 5.94  | 2.38  | 0.21 | 0.21  | 93.72 | 0 | out     |
| 93  | 8  | 70-   | I | 9.03  | 13.6  | 70.02 | 81.95 | 22.94 | 36.8  | 1.03 | 1.22  | 81.95 | 0 | general |
| 94  | 46 | 40-49 | O | 2.15  | 0.14  | 1.3   | 0.86  | 0.76  | 0.31  | 0.37 | 0.28  | 2.15  | 0 | out     |
| 95  | 15 | 50-59 | I | 0.41  | 0.3   | 0.82  | 0.41  | 0.63  | 0.27  | 0.21 | 0.13  | 0.82  | 0 | general |
| 96  | 10 | 60-69 | O | 0.16  | 0.13  | 0.2   | 0.49  | 0.6   | 0.24  | 0.23 | 0.15  | 0.6   | 0 | out     |
| 97  | 5  | 70-   | I | 1.68  | 1.38  | 2.19  | 1.84  | 2.44  | 0.32  | 0.27 | 0.19  | 2.44  | 0 | general |
| 98  | 28 | 60-69 | I | 9.52  | 38    | 80.28 | 1.87  | 9.19  | 66.1  | 0.79 | 3.72  | 80.28 | 0 | ICU     |
| 99  | 32 | 40-49 | I | 42.86 | 5.03  | 14.88 | 3.79  | 49.82 | 0.43  | 0.62 | 0.38  | 49.82 | 0 | general |
| 100 | 7  | 70-   | I | 11.91 | 1.45  | 98.78 | 76.21 | 15.65 | 69.66 | 0.92 | 1.01  | 98.78 | 0 | ICU     |
| 101 | 5  | 40-49 | I | 3.67  | 2.4   | 11.1  | 1.17  | 3.73  | 0.84  | 1.22 | 0.39  | 11.1  | 0 | ICU     |
| 102 | 13 | 60-69 | I | 0.88  | 1.47  | 12.03 | 44.48 | 6.77  | 0.54  | 0.56 | 1.6   | 44.48 | 0 | ICU     |
| 103 | 8  | 70-   | I | 13.62 | 14.99 | 65.79 | 7.03  | 29.98 | 13.97 | 1.37 | 12.39 | 65.79 | 0 | ICU     |
| 104 | 6  | 40-49 | O | 0.21  | 0.13  | 0.27  | 0.58  | 0.93  | 0.19  | 0.19 | 0.13  | 0.93  | 0 | out     |
| 105 | 8  | 70-   | I | 2.14  | 1.18  | 97.05 | 61.69 | 17.53 | 85.61 | 1.37 | 4.28  | 97.05 | 0 | ICU     |
| 106 | 11 | 60-69 | O | 0.32  | 0.32  | 0.52  | 0.49  | 1.16  | 0.35  | 0.27 | 0.22  | 1.16  | 0 | out     |
| 107 | 9  | 60-69 | I | 27.04 | 70.03 | 84.91 | 8.8   | 15.13 | 96.07 | 1.04 | 96.48 | 96.48 | 0 | ICU     |
| 108 | 4  | 70-   | O | 0.5   | 2.96  | 0.53  | 2.34  | 1.47  | 0.29  | 0.19 | 0.17  | 2.96  | 0 | out     |
| 109 | 15 | 50-59 | I | 1.29  | 7.29  | 22.31 | 1.28  | 14.41 | 0.65  | 0.45 | 0.65  | 22.31 | 0 | ICU     |
| 110 | 7  | 70-   | I | 13.94 | 1.3   | 78.13 | 12.39 | 6.81  | 59.16 | 2.34 | 1.64  | 78.13 | 0 | ICU     |
| 111 | 26 | 70-   | O | 3.05  | 85.51 | 2.98  | 2.47  | 3.99  | 7.83  | 0.27 | 0.21  | 85.51 | 0 | out     |
| 112 | 16 | 60-69 | I | 20    | 14.98 | 10.49 | 23.73 | 10.79 | 12.68 | 1.1  | 3.4   | 23.73 | 0 | ICU     |
| 113 | 14 | 60-69 | O | 20.16 | 0.77  | 28.58 | 68.92 | 19.37 | 90.35 | 1.35 | 56.55 | 90.35 | 0 | out     |
| 114 | 4  | 70-   | I | 4.65  | 3.88  | 6.13  | 3.31  | 6.88  | 0.87  | 22.6 | 8.73  | 22.6  | 0 | ICU     |
| 115 | 6  | 60-69 | I | 54.1  | 34.43 | 60.19 | 2.97  | 5.41  | 2.25  | 2.29 | 0.32  | 60.19 | 0 | general |
| 116 | 6  | 70-   | O | 0.27  | 0.12  | 0.33  | 1.76  | 2.59  | 0.33  | 0.56 | 0.21  | 2.59  | 0 | out     |

**Supplementary Figure 1. The minimal dataset data generated or analyzed during this study.** The radiologists' reading times (in seconds) for each chest radiographs were recorded based on whether artificial intelligence (AI) results were available or not, along with patient age (presented in range), inpatient or outpatient status, ward type, presence of concomitant thoracic lesions as determined by AI, and AI-determined abnormality scores.
